# Supplementary material for: Deep eutectic solvent (DES) as both solvent and catalyst for oxidation of furfural to maleic acid and fumaric acid
Source: Royal Society of Chemistry journal article supplement (doi:10.1039/c8gc04022b), 2019-01-01
Supplement: c8gc04022b1.pdf [file c8gc04022b1.pdf]

Supporting Information for:

**Deep eutectic solvent (DES) as both Solvent and Catalyst for  
Oxidation of Furfural to Maleic acid and Fumaric acid**

*Yong Ni, Zhihao Bi, Hui Su, Lifeng Yan \**

CAS Key Laboratory of Soft Matter Chemistry, Hefei National Laboratory for  
Physical Sciences at the Microscale, and Department of Chemical Physics, iCHEM,

University of Science and Technology of China, Hefei, 230026, P.R.China.

Fax: +86-551-63603748; Tel: +86-551-63606853; E-mail: [lfyan@ustc.edu.cn](mailto:lfyan@ustc.edu.cn)

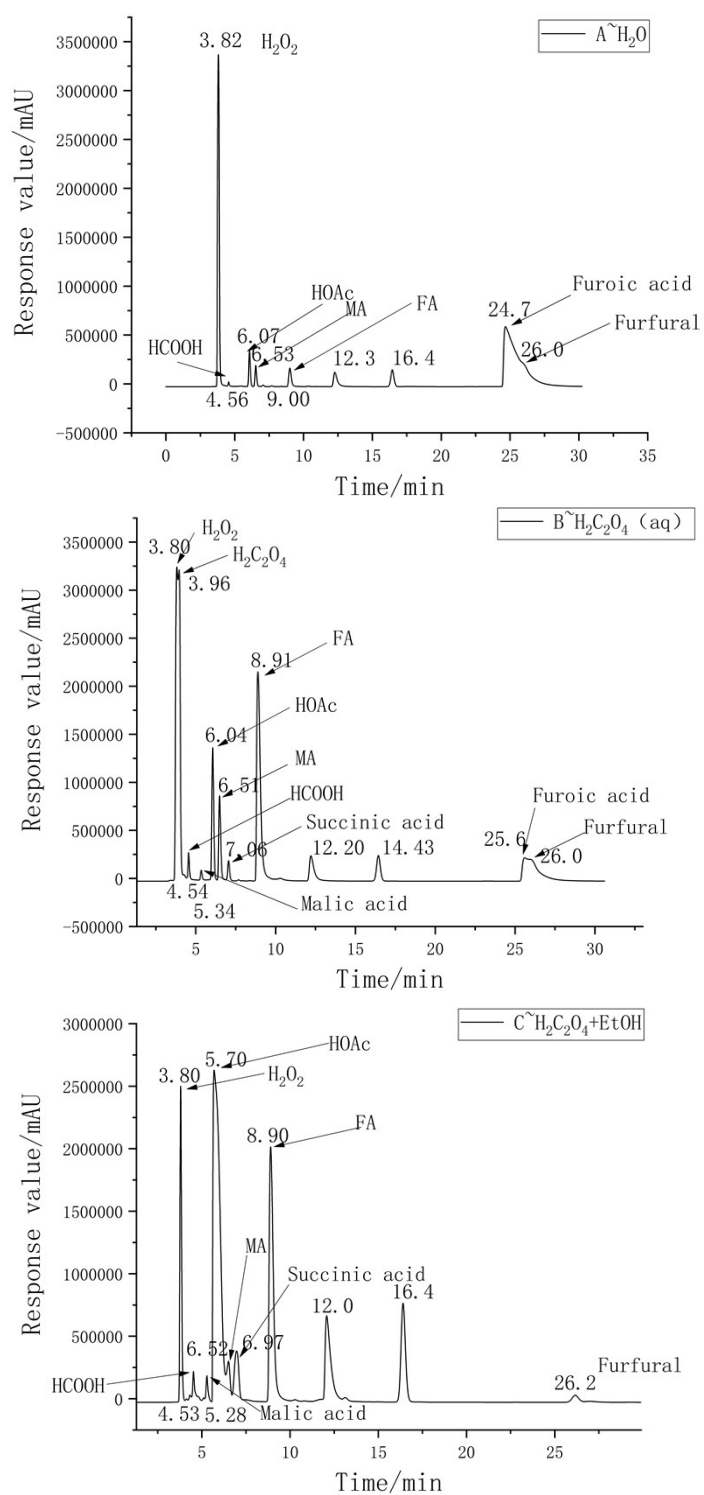

**Figure S1.** HPLC of products obtained from furfural oxidation in various solvents: A) pure water; B) saturated oxalic acid aqueous solution; C) saturated oxalic acid ethanol solution.

**Table S1.** Yield of MA and FA when the reaction was carried out in various solvents

| <b>Solvent</b>      | <b>MA (%)</b> | <b>FA (%)</b> | <b>MA+FA (%)</b> |
|---------------------|---------------|---------------|------------------|
| H <sub>2</sub> O    | 0.4           | 0.6           | 1.0              |
| H <sub>2</sub> O+OA | 2.0           | 9.0           | 11.0             |
| Ethanol+OA          | 1.5           | 8.4           | 9.8              |

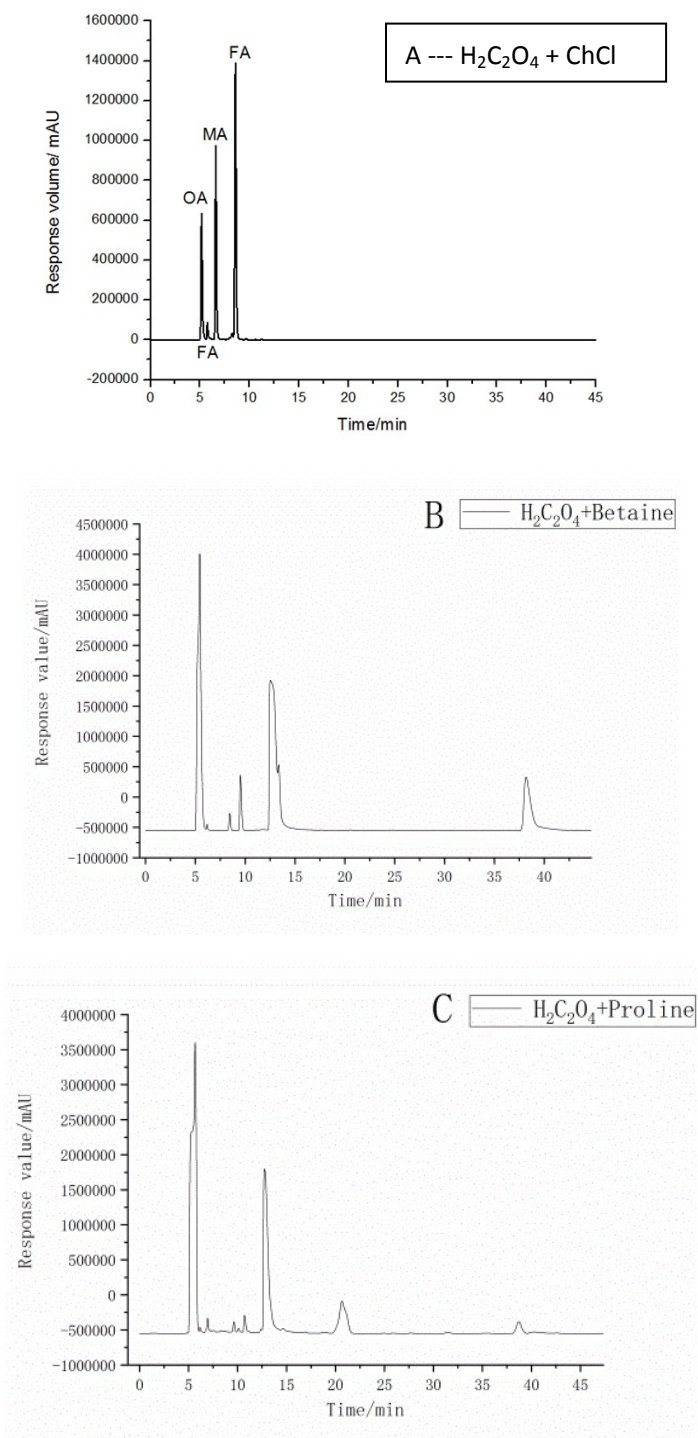

**Figure S2.** HPLC of products obtained from furfural oxidation in various oxalic acid based DES: A) H<sub>2</sub>C<sub>2</sub>O<sub>4</sub>/ChCl; B) H<sub>2</sub>C<sub>2</sub>O<sub>4</sub>/Betaine; C) H<sub>2</sub>C<sub>2</sub>O<sub>4</sub>/Proline.

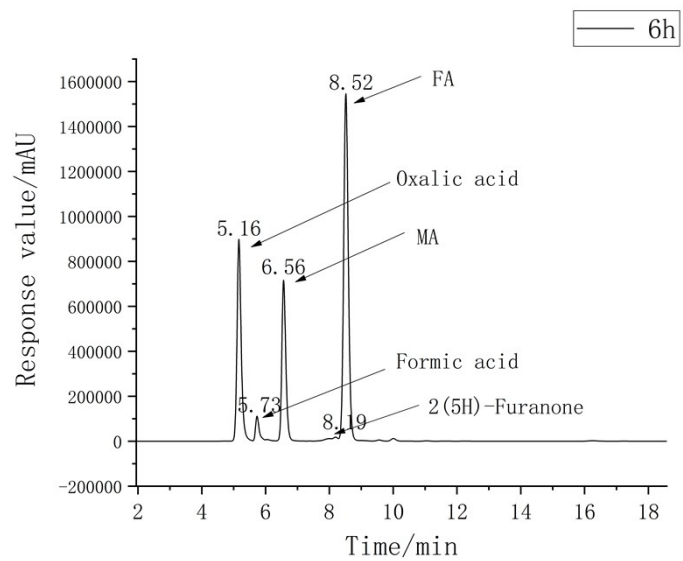

**Figure S3.** The reaction conditions of this sample: DES ( $\text{H}_2\text{C}_2\text{O}_4$ :ChCl=1:3, about 0.5 g : 1.8 g), Furfural: 1 mmol, Temperature: 50 °C, Time: 6h.
